# Supplementary material for: 3D-printed palladium/activated carbon-based catalysts for the dehydrogenation of formic acid as a hydrogen carrier
Source: Royal Society of Chemistry journal article supplement (doi:10.1039/d3ta05644a), 2023-01-01
Supplement: d3ta05644a1.pdf [file d3ta05644a1.pdf]

### 3D printed palladium/activated carbon-based catalysts for the dehydrogenation of formic acid as hydrogen carrier

Irene Díaz-Herrezuelo<sup>1</sup>, Gonzalo Vega<sup>2\*</sup>, Marina Navarro<sup>2</sup>, Pilar Miranzo<sup>1</sup>, M. Isabel Osendi<sup>1</sup>, Jose A. Casas<sup>2</sup>, Asunción Quintanilla<sup>2</sup>, Manuel Belmonte<sup>1\*</sup>

<sup>1</sup>Institute of Ceramics and Glass (ICV-CSIC), Kelsen 5, 28049 Madrid, Spain

<sup>2</sup>Chemical Engineering Department, Universidad Autónoma de Madrid, 28049, Madrid, Spain

**Table S1.** Characterization of AC powders including specific surface area ( $S_{\text{BET}}$ ), external area ( $A_{\text{EXT}}$ ), pore volume ( $V_{\text{PORE}}$ ), pore diameter ( $D_{\text{PORE}}$ ) and elemental analysis.

| $S_{\text{BET}}$                     | $A_{\text{EXT}}$                     | $V_{\text{PORE}}$                     | $D_{\text{PORE}}$ | Carbon         | Oxygen        | Nitrogen | Sulphur         |
|--------------------------------------|--------------------------------------|---------------------------------------|-------------------|----------------|---------------|----------|-----------------|
| ( $\text{m}^2 \cdot \text{g}^{-1}$ ) | ( $\text{m}^2 \cdot \text{g}^{-1}$ ) | ( $\text{cm}^3 \cdot \text{g}^{-1}$ ) | (nm)              | (wt.%)         | (wt.%)        | (wt.%)   | (wt.%)          |
| 738                                  | 514                                  | 0.098                                 | 3.53              | $87.6 \pm 0.5$ | $7.3 \pm 0.3$ | $< 0.16$ | $0.34 \pm 0.05$ |

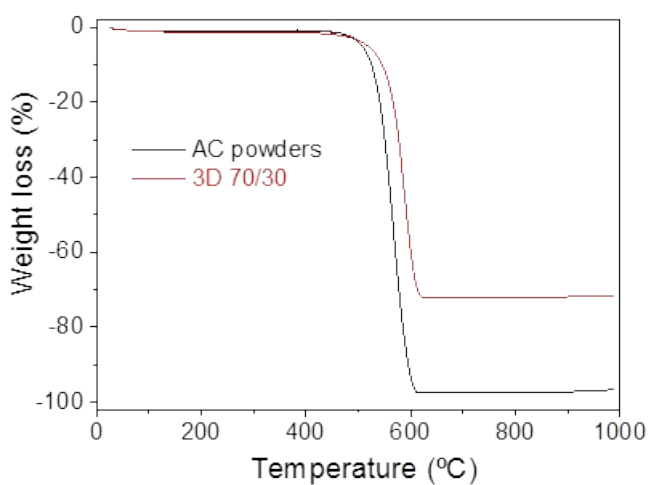

**Figure S1.** Weight loss (TGA) as a function of the temperature for the pristine AC powders and the as-printed 3D AC/B (70/30) structure.

**Calculation of the gas produced upon reaction:**

$$Q_{GAS}(mL\ min^{-1}) = Q_{He}(mL\ min^{-1}) \cdot \text{dilution factor}$$

$$\text{dilution factor} = \frac{D}{1 - D}$$

$$D = \frac{\%H_{2GC} + \%CO_{2GC} + \%CO_{GC}}{100}$$

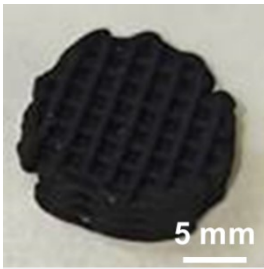

**Figure S2.** 3D AC/Al<sub>2</sub>O<sub>3</sub> structure after placing the monolith into a beaker containing FA at 55 °C for 1 h and using mechanical stirring.

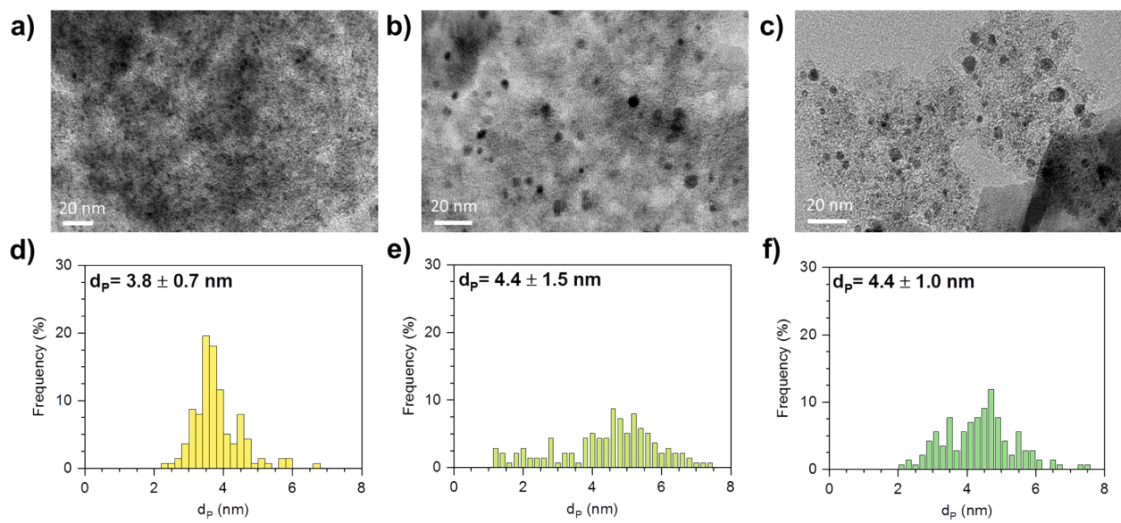

**Figure S3.** TEM images and particle size distribution ( $d_p$ ) histograms of the 3D Pd/AC catalysts at  $T = 55^\circ\text{C}$  after the following uses: a,d) 1<sup>st</sup> use, b,e) 3<sup>rd</sup> use and c,f) 5<sup>th</sup> use.

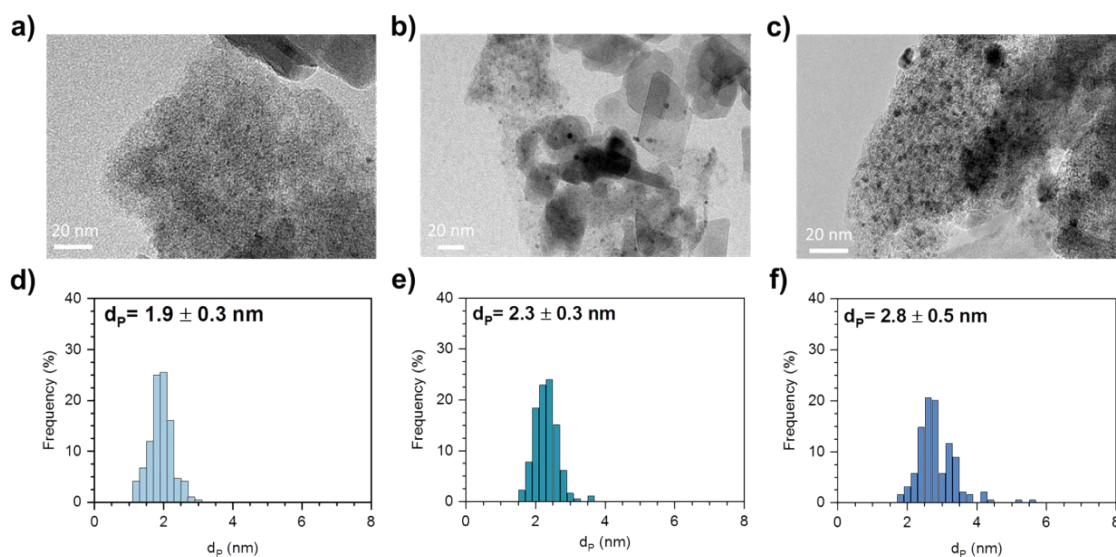

**Figure S4.** TEM images and particle size distribution histograms ( $d_p$ ) of the use 3D Pd/AC catalysts at  $T = 25^\circ\text{C}$  after the following uses: a,d) 1<sup>st</sup> use, b,e) 3<sup>rd</sup> use and c,f) 5<sup>th</sup> use.

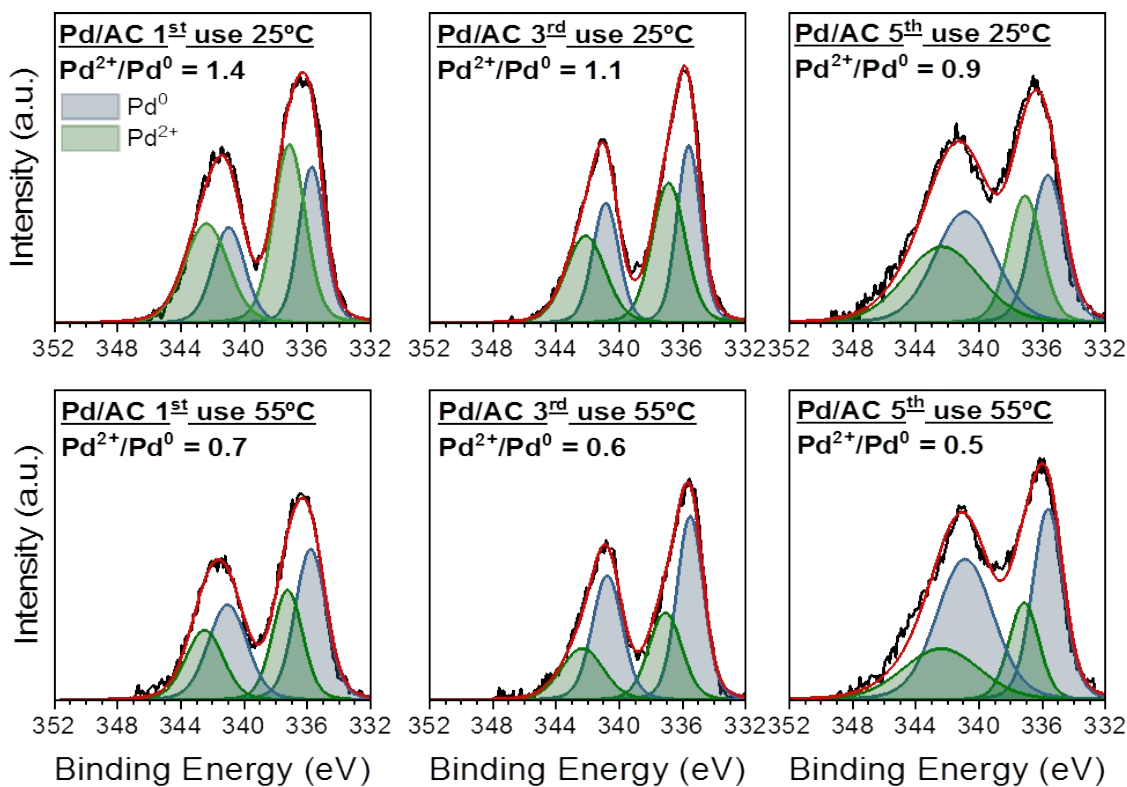

**Figure S5.** XPS spectra of Pd 3d core level after different uses (1<sup>st</sup>, 3<sup>rd</sup>, 5<sup>th</sup>) of the 3D Pd/AC catalysts tested at 25 and 55 °C.

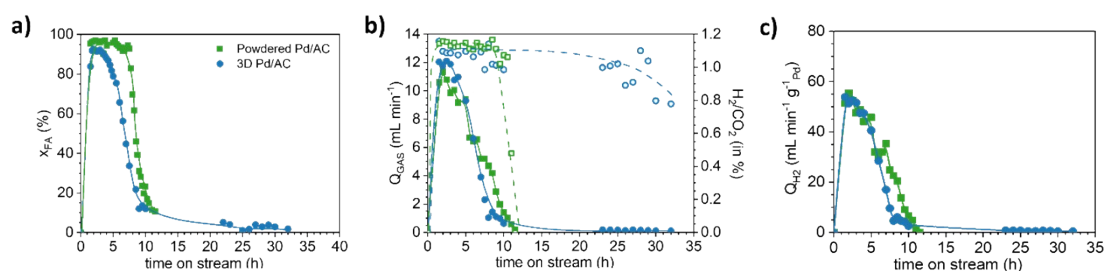

**Figure S6.** Performance of powdered and 3D Pd/AC catalyst in terms of: (a)  $X_{FA}$ , (b)  $Q_{GAS}$  produced and  $H_2/CO_2$  ratio and (c)  $H_2$  production per gram of Pd upon time-on-stream at  $C_{FA,0} = 1$  M,  $\tau = 160$  g<sub>CAT</sub>·h·L<sup>-1</sup> and  $T = 55$  °C.

The powdered 5 wt.% Pd/AC catalyst was prepared according to the following method: 3D AC monoliths were crushed and ground in an agate mortar and, then, 3 g of AC monolith powder (previously hydrated with 30 mL of Milli-Q water) were added to the PdCl<sub>2</sub> precursor solution at 65 °C. After 1 h of magnetic stirring, the temperature was increased to 95 °C and maintained until complete evaporation of water. The Pd impregnated powders were washed with Milli-Q water and oven dried at 60 °C overnight. Finally, they were reduced to remove the residual chlorides in a quartz tube under a H<sub>2</sub>/N<sub>2</sub> stream (50/100 NmL·min<sup>-1</sup>) at 250 °C for 2 h at a heating rate of 10 °C·min<sup>-1</sup>.

**Table S2.** Main chemical characteristics of the 3D and powdered Pd/AC catalysts.

| Fresh catalysts | Pd     | Pd <sup>2+</sup> /Pd <sup>0</sup> | $d_p$ |
|-----------------|--------|-----------------------------------|-------|
|                 | (wt.%) | (at.%)                            | (nm)  |

---

|          |     |     |               |
|----------|-----|-----|---------------|
| 3D Pd/AC | 4.9 | 1.4 | $1.9 \pm 0.4$ |
|----------|-----|-----|---------------|

---

|                |     |     |               |
|----------------|-----|-----|---------------|
| Powdered Pd/AC | 4.5 | 1.4 | $2.2 \pm 0.8$ |
|----------------|-----|-----|---------------|

---
